# Supplementary material for: Colloid Systems and Interfaces Stability of Cerium Oxide Nanoparticles in Aqueous Environments: Effects of pH, Ionic Composition, and Suwanee River Humic and Fulvic Acids
Source: Hindawi journal article supplement (doi:10.1155/2024/2970861), 2024-01-29
Supplement: f1 [file 2970861.f1.docx]

**Colloid systems and interfaces stability of cerium oxide nanoparticles**

**in aqueous environments: Effects of pH, ionic composition, and**

**Suwanee river humic and fulvic acids**

Electronic Supplementary Material

Linlin Mu1, Mahsa Ghorbani1, Philippe C. Baveye2, and Christophe J.G. Darnault1,*

1 Department of Environmental Engineering and Earth Sciences, School of Civil and Environmental Engineering and Earth Sciences, Clemson University, 342 Computer Court, Anderson, SC 29625, USA

2 Saint Loup Research Institute, 7 rue des chênes, Saint Loup Lamairé 79600, France

*Corresponding author: Tel: +1 864 656 1398; Fax + 1 864 656 0672.

E-mail address: [cdarnau@clemson.edu](mailto:cdarnau@clemson.edu)

**Results**

**Table S1.** The mean and standard deviation of hydrodynamic diameter of CeO2 NPs during the first 100 seconds and at ~ 1 hr of around 1-hour measurements for each pH (1 – 14).

| pH | Average Hydrodynamic diameter (nm) (during the first 100 seconds) | Average Hydrodynamic diameter (nm) (at ∼1 hr) |
| --- | --- | --- |
| 1 | 256.65 ± 42.06 | 1510.95 ± 173.68 |
| 2 | 93.40 ± 7.28 | 104.90 ± 4.09 |
| 3 | 88.13 ± 4.46 | 98.22 ± 4.87 |
| 4 | 81.80 ± 4.36 | 99.80 ± 3.63 |
| 5 | 89.65 ± 4.93 | 101.70 ± 2.57 |
| 6 | 86.99 ± 6.45 | 115.25 ± 9.14 |
| 7 | 96.92 ± 5.62 | 128.24 ± 6.53 |
| 8 | 84.91 ± 3.61 | 112.28 ± 2.11 |
| 9 | 83.56 ± 7.05 | 108.29 ± 2.96 |
| 10 | 225.81 ± 46.66 | 1719.68 ± 267.49 |
| 11 | 72.97 ± 5.32 | 93.79 ± 3.40 |
| 12 | 75.67 ± 5.50 | 103.07 ± 5.96 |
| 13 | 384.22 ± 66.53 | 1930.14 ± 254.36 |
| 14 | 358.67 ± 74.16 | 2254.80 ± 323.37 |


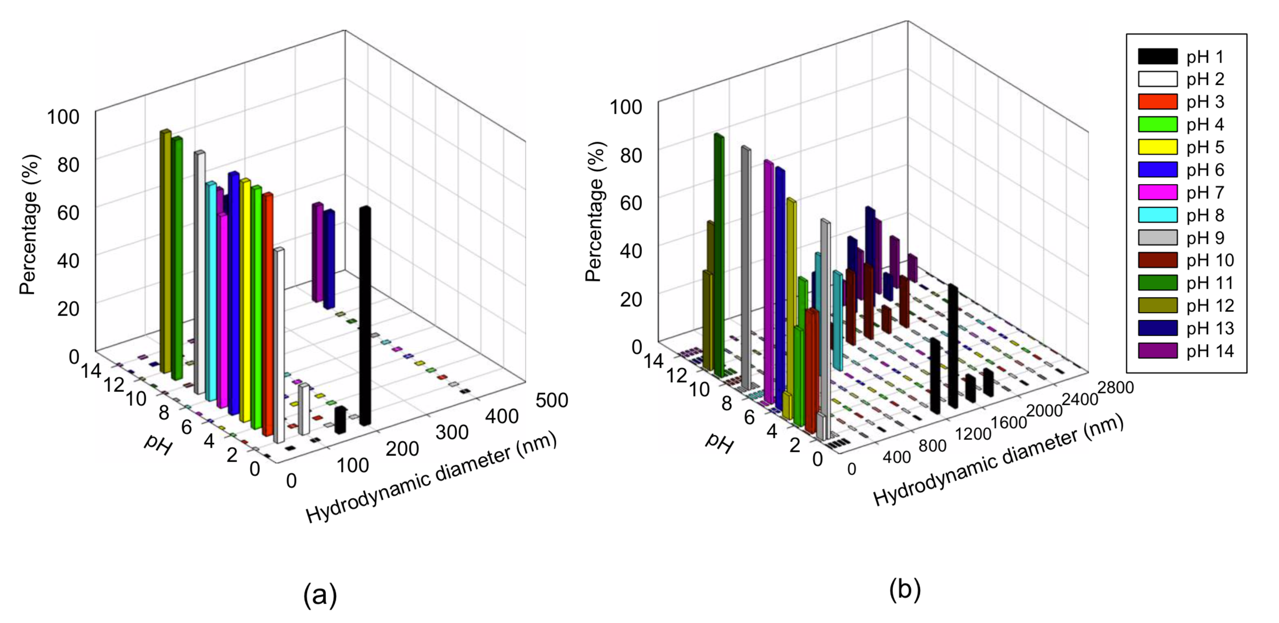


**Figure S1.** Particle size distribution of CeO2 NPs at pH ranging from 1 - 14. The time of the nanoparticle size measured by DLS is respectively (a) during the first 100 seconds and (b) at ~ 1 hr. The legend shows the percentages of particle size distributed at each pH.

**Table S2.** The mean and standard deviation of zeta potential of CeO2 NPs under varying concentrations of NaCl/CaCl2 in the absence/presence of HA/FA at three different pHs (8.2, 10.2, and 12.2) and different time intervals.

|  |  |  | Zeta Potential (mV) | | | | | | |
| --- | --- | --- | --- | --- | --- | --- | --- | --- | --- |
| Chemical | pH | Electrolyte (mM) | 0 - 10 min | 10 - 20 min | 20 - 30 min | 30 - 40 min | 40 - 50 min | 50 - 60 min | 0 - 60 min |
| NaCl | 8.2 | 0.00 | 20.46 ± 11.12 | 22.25 ± 12.94 | 18.93 ± 12.82 | 21.88 ± 15.54 | 23.20 ± 11.63 | 19.88 ± 12.47 | 21.12 ± 12.77 |
|  |  | 0.05 | 14.20 ± 19.58 | 12.36 ± 13.49 | 14.61 ± 13.95 | 16.75 ± 15.83 | 18.03 ± 11.06 | 17.10 ± 10.56 | 15.68 ± 13.77 |
|  |  | 0.10 | 19.12 ± 16.15 | 23.31 ± 9.66 | 23.14 ± 9.12 | 23.52 ± 12.59 | 21.04 ± 13.95 | 17.88 ± 13.17 | 21.78 ± 12.14 |
|  |  | 0.50 | 17.07 ± 11.47 | 21.92 ± 12.99 | 18.20 ± 13.88 | 22.14 ± 12.00 | 21.96 ± 13.07 | 20.85 ± 9.60 | 20.72 ± 11.94 |
|  |  | 1.00 | 11.17 ± 9.42 | 9.61 ± 11.72 | 11.22 ± 11.20 | 7.48 ± 11.41 | 8.77 ± 11.70 | 7.87 ± 13.63 | 9.26 ± 11.71 |
|  | 10.2 | 0.00 | -7.95 ± 21.08 | -10.80 ± 16.12 | -12.68 ± 15.92 | -12.05 ± 15.34 | -10.53 ± 15.59 | -14.70 ± 15.69 | -11.39 ± 16.75 |
|  |  | 0.05 | -14.50 ± 14.18 | -15.45 ± 13.58 | -18.77 ± 12.75 | -10.85 ± 16.64 | -20.54 ± 12.54 | -19.67 ± 9.46 | -16.99 ± 13.30 |
|  |  | 0.10 | 7.55 ± 13.30 | 10.51 ± 10.85 | 9.95 ± 9.76 | 7.36 ± 10.82 | 5.16 ± 11.09 | 1.22 ± 13.53 | 7.03 ± 11.83 |
|  |  | 0.50 | 9.07 ± 14.56 | 10.24 ± 10.96 | 5.94 ± 13.24 | 2.01 ± 13.67 | 4.39 ± 11.85 | 5.81 ± 13.71 | 6.11 ± 13.18 |
|  |  | 1.00 | -11.97 ± 12.86 | -11.40 ± 11.89 | -9.57 ± 14.19 | -11.80 ± 17.33 | -10.85 ± 12.09 | -9.21 ± 15.99 | -10.96 ± 13.95 |
|  | 12.2 | 0.00 | -10.53 ± 20.30 | -33.35 ± 11.39 | -30.31 ± 11.28 | -30.30 ± 12.83 | -31.13 ± 11.91 | -32.75 ± 14.28 | -30.39 ± 13.74 |
|  |  | 0.05 | -26.06 ± 10.55 | -30.98 ± 11.59 | -35.69 ± 11.17 | -35.16 ± 10.21 | -40.02 ± 11.35 | -36.97 ± 9.20 | -35.16 ± 11.24 |
|  |  | 0.10 | -44.83 ± 14.06 | -43.15 ± 7.76 | -37.96 ± 13.02 | -36.69 ± 12.34 | -35.43 ± 11.86 | -33.97 ± 12.25 | -38.72 ± 12.28 |
|  |  | 0.50 | -34.46 ± 11.37 | -27.88 ± 9.21 | -38.32 ± 9.60 | -45.37 ± 12.71 | -33.87 ± 14.11 | -39.95 ± 11.55 | -37.46 ± 12.66 |
|  |  | 1.00 | -28.08 ± 14.79 | -35.96 ± 12.57 | -33.77 ± 12.65 | -34.76 ± 12.67 | -33.73 ± 10.53 | -39.37 ± 10.43 | -34.86 ± 12.39 |
| CaCl2 | 8.2 | 0.00 | 20.46 ± 11.12 | 22.25 ± 12.94 | 18.93 ± 12.82 | 21.88 ± 15.54 | 23.20 ± 11.63 | 19.88 ± 12.47 | 21.12 ± 12.77 |
|  |  | 0.05 | 17.97 ± 14.52 | 21.35 ± 12.79 | 24.18 ± 10.41 | 26.25 ± 8.52 | 25.13 ± 13.14 | 26.94 ± 9.66 | 24.12 ± 11.77 |
|  |  | 0.10 | 16.21 ± 11.37 | 24.99 ± 14.07 | 25.61 ± 14.40 | 26.56 ± 9.76 | 30.61 ± 9.26 | 27.65 ± 7.76 | 26.43 ± 11.44 |
|  |  | 0.50 | 19.64 ± 12.92 | 17.21 ± 14.22 | 18.60 ± 9.51 | 13.21 ± 16.73 | 15.48 ± 13.92 | 12.71 ± 13.08 | 16.09 ± 13.67 |
|  |  | 1.00 | 21.41 ± 13.45 | 16.09 ± 14.92 | 20.81 ± 10.45 | 22.94 ± 7.64 | 24.72 ± 8.75 | 22.40 ± 7.50 | 22.20 ± 7.53 |
|  | 10.2 | 0.00 | -7.95 ± 21.08 | -10.80 ± 16.12 | -12.68 ± 15.92 | -12.05 ± 15.34 | -10.53 ± 15.59 | -14.70 ± 15.69 | -11.39 ± 16.75 |
|  |  | 0.05 | 14.17 ± 11.94 | 13.80 ± 11.22 | 13.15 ± 11.89 | 14.16 ± 11.66 | 14.62 ± 12.85 | 2.13 ± 18.92 | 13.59 ± 12.27 |
|  |  | 0.10 | 6.10 ± 14.51 | 5.03 ± 11.55 | 5.88 ± 14.12 | 5.97 ± 11.51 | 1.26 ± 12.34 | -1.16 ± 15.33 | 3.80 ± 13.44 |
|  |  | 0.50 | -1.52 ± 12.72 | 0.05 ± 15.36 | 0.70 ± 15.88 | -0.36 ± 14.90 | -5.87 ± 14.51 | -5.88 ± 14.52 | -2.32 ± 14.75 |
|  |  | 1.00 | 9.59 ± 12.37 | 6.96 ± 11.71 | 7.17 ± 11.67 | 9.53 ± 10.14 | 7.80 ± 10.02 | 6.70 ± 12.49 | 7.86 ± 11.42 |
|  | 12.2 | 0.00 | -10.53 ± 20.30 | -33.35 ± 11.39 | -30.31 ± 11.28 | -30.30 ± 12.83 | -31.13 ± 11.91 | -32.75 ± 14.28 | -30.39 ± 13.74 |
|  |  | 0.05 | -29.61 ± 11.28 | -28.78 ± 15.31 | -29.97 ± 11.49 | -29.78 ± 12.10 | -32.93 ± 10.18 | -36.22 ± 12.78 | -31.47 ± 12.51 |
|  |  | 0.10 | -27.63 ± 12.04 | -29.29 ± 9.87 | -29.81 ± 10.83 | -30.17 ± 11.41 | -29.02 ± 10.57 | -28.58 ± 11.66 | -29.06 ± 11.00 |
|  |  | 0.50 | -0.83 ± 22.71 | -1.62 ± 25.52 | -20.94 ± 3.23 | 6.65 ± 16.78 | -17.63 ± 9.28 | 9.42 ± 26.07 | -5.65 ± 20.67 |
|  |  | 1.00 | -15.93 ± 16.08 | -25.53 ± 17.02 | -25.59 ± 19.59 | -26.96 ± 16.02 | -32.76 ± 12.98 | -31.82 ± 13.82 | -27.86 ± 16.09 |
| HA, NaCl | 8.2 | 0.00 | 8.84 ± 16.75 | 7.20 ± 22.43 | 6.70 ± 22.39 | 8.30 ± 21.52 | 9.93 ± 20.91 | 6.95 ± 19.71 | 7.98 ± 20.71 |
|  |  | 0.10 | 16.77 ± 10.77 | 17.95 ± 14.08 | 11.08 ± 14.75 | 6.71 ± 19.55 | 4.63 ± 17.87 | 12.60 ± 17.66 | 12.15 ± 16.31 |
|  |  | 1.00 | 13.73 ± 7.68 | 12.10 ± 11.66 | 15.20 ± 7.75 | 12.45 ± 10.27 | 12.38 ± 9.70 | 12.58 ± 9.82 | 13.03 ± 9.68 |
| HA, CaCl2 |  | 0.10 | 19.06 ± 13.06 | 21.04 ± 12.45 | 15.84 ± 14.78 | 18.36 ± 10.19 | 16.18 ± 14.78 | 20.17 ± 10.77 | 18.30 ± 12.77 |
|  |  | 1.00 | 15.95 ± 16.00 | 11.87 ± 14.09 | 14.30 ± 17.33 | 8.59 ± 14.25 | 7.00 ± 14.31 | 7.89 ± 13.58 | 11.01 ± 15.21 |
| HA, NaCl | 10.2 | 0.00 | -19.83 ± 21.60 | -15.64 ± 19.94 | -12.78 ± 17.74 | -13.09 ± 19.06 | -12.30 ± 18.61 | -11.43 ± 18.11 | -13.89 ± 19.10 |
|  |  | 0.10 | 9.24 ± 13.53 | 6.04 ± 13.33 | 4.79 ± 18.21 | 3.46 ± 17.34 | -0.13 ± 16.35 | 0.26 ± 15.63 | 4.89 ± 15.84 |
|  |  | 1.00 | -21.99 ± 10.93 | -20.26 ± 9.17 | -18.58 ± 9.41 | -17.02 ± 9.74 | -19.66 ± 8.79 | -17.81 ± 9.96 | -19.29 ± 9.69 |
| HA, CaCl2 |  | 0.10 | 6.72 ± 12.30 | 8.49 ± 11.33 | 4.86 ± 12.33 | 3.42 ± 12.03 | 4.34 ± 13.17 | 0.92 ± 10.79 | 4.78 ± 12.17 |
|  |  | 1.00 | -3.55 ± 19.14 | -2.63 ± 15.67 | -1.11 ± 17.27 | -4.75 ± 14.81 | -5.11 ± 15.99 | -7.66 ± 16.48 | -4.14 ± 16.34 |
| HA, NaCl | 12.2 | 0.00 | -31.35 ± 9.94 | -32.69 ± 15.90 | -27.07 ± 11.10 | -29.09 ± 10.78 | -25.49 ± 19.49 | -31.88 ± 17.70 | -29.86 ± 14.52 |
|  |  | 0.10 | -35.36 ± 6.74 | -40.72 ± 13.30 | -48.53 ± 13.61 | -46.78 ± 10.33 | -41.25 ± 11.96 | -32.99 ± 11.97 | -42.06 ± 12.91 |
|  |  | 1.00 | -37.78 ± 12.73 | -39.60 ± 12.68 | -40.82 ± 11.09 | -40.35 ± 10.02 | -41.30 ± 13.02 | -38.14 ± 12.09 | -39.73 ± 11.93 |
| HA, CaCl2 |  | 0.10 | -34.34 ± 9.15 | -36.10 ± 11.99 | -37.69 ± 9.64 | -35.26 ± 9.88 | -36.76 ± 13.30 | -36.32 ± 10.92 | -36.12 ± 10.87 |
|  |  | 1.00 | -35.15 ± 13.16 | -28.05 ± 10.86 | -36.39 ± 9.78 | -30.11 ± 14.28 | -26.35 ± 15.70 | -32.32 ± 11.16 | -31.70 ± 12.72 |
| FA, NaCl | 8.2 | 0.00 | -37.87 ± 12.04 | -48.02 ± 12.77 | -59.32 ± 11.27 | -51.85 ± 14.11 | -51.90 ± 11.56 | -52.51 ± 11.05 | -51.96 ± 13.35 |
|  |  | 0.10 | -45.51 ± 12.84 | -51.52 ± 9.78 | -53.25 ± 10.08 | -46.31 ± 10.86 | -53.82 ± 15.31 | -48.35 ± 11.87 | -49.65 ± 12.06 |
|  |  | 1.00 | -44.44 ± 9.82 | -49.33 ± 10.64 | -48.09 ± 14.48 | -46.85 ± 11.06 | -43.40 ± 13.80 | -49.24 ± 8.34 | -47.01 ± 11.65 |
| FA, CaCl2 |  | 0.10 | -42.88 ± 9.80 | -41.97 ± 10.41 | -43.62 ± 9.85 | -46.76 ± 11.74 | -45.47 ± 11.74 | -44.53 ± 9.17 | -44.29 ± 10.55 |
|  |  | 1.00 | -25.98 ± 9.91 | -23.84 ± 11.69 | -23.70 ± 9.95 | -25.13 ± 12.41 | -23.98 ± 9.94 | -23.60 ± 10.14 | -24.37 ± 10.65 |
| FA, NaCl | 10.2 | 0.00 | -44.98 ± 29.14 | -54.67 ± 11.91 | -57.08 ± 10.41 | -51.26 ± 9.11 | -49.71 ± 13.03 | -47.91 ± 12.33 | -51.66 ± 15.66 |
|  |  | 0.10 | -57.05 ± 10.52 | -61.59 ± 14.41 | -64.11 ± 12.53 | -58.68 ± 11.50 | -61.96 ± 12.23 | -59.79 ± 11.12 | -60.47 ± 12.10 |
|  |  | 1.00 | -40.91 ± 12.58 | -44.34 ± 11.60 | -43.39 ± 10.76 | -39.56 ± 12.94 | -39.58 ± 10.90 | -32.42 ± 16.02 | -40.31 ± 12.98 |
| FA, CaCl2 |  | 0.10 | -28.22 ± 16.48 | -27.94 ± 18.97 | -31.61 ± 12.59 | -31.44 ± 12.18 | -22.85 ± 20.12 | -28.52 ± 13.07 | -28.82 ± 15.49 |
|  |  | 1.00 | -21.59 ± 8.28 | -22.69 ± 10.83 | -17.60 ± 14.55 | -19.10 ± 13.31 | -15.68 ± 13.79 | -23.51 ± 10.02 | -20.15 ± 12.13 |
| FA, NaCl | 12.2 | 0.00 | -26.32 ± 10.81 | -30.97 ± 11.83 | -22.80 ± 15.70 | -26.04 ± 11.87 | -22.83 ± 18.78 | -15.24 ± 17.66 | -24.34 ± 15.22 |
|  |  | 0.10 | -32.26 ± 11.39 | -31.05 ± 15.03 | -35.32 ± 8.57 | -38.72 ± 12.02 | -41.84 ± 9.50 | -42.14 ± 10.62 | -37.45 ± 11.91 |
|  |  | 1.00 | -36.14 ± 10.79 | -34.78 ± 12.63 | -37.12 ± 10.19 | -33.62 ± 17.63 | -36.70 ± 10.96 | -32.55 ± 10.56 | -35.26 ± 12.33 |
| FA, CaCl2 |  | 0.10 | -25.21 ± 19.85 | -25.21 ± 12.60 | -28.99 ± 15.44 | -25.62 ± 12.34 | -24.32 ± 13.28 | -28.97 ± 10.54 | -26.56 ± 14.22 |
|  |  | 1.00 | -28.23 ± 12.11 | -30.03 ± 10.71 | -29.87 ± 10.03 | -27.26 ± 11.69 | -33.44 ± 10.46 | -34.07 ± 9.83 | -30.91 ± 10.85 |

**Table S3.** The mean and standard deviation of hydrodynamic diameter of CeO2 NPs during the first 100 seconds and at ~ 1 hr of around 1-hour measurements at three different pHs (8.2, 10.2, and 12.2) and each NaCl/CaCl2 concentration.

| pH | Electrolyte (mM) | NaCl | | CaCl2 | |
| --- | --- | --- | --- | --- | --- |
|
| Average Hydrodynamic diameter (nm) | | Average Hydrodynamic diameter (nm) | |
| During the first 100 seconds | At ∼1 hr | During the first 100 seconds | At ∼1 hr |
| 8.2 | 0.00 | 84.91 ± 3.61 | 112.28 ± 2.11 | 84.91 ± 3.61 | 112.28 ± 2.11 |
|  | 0.05 | 84.33 ± 2.34 | 99.31 ± 3.76 | 92.52 ± 4.01 | 106.82 ± 2.29 |
|  | 0.10 | 87.59 ± 2.67 | 111.35 ± 2.83 | 123.74 ± 6.92 | 129.07 ± 5.38 |
|  | 0.50 | 85.50 ± 1.59 | 109.45 ± 4.24 | 98.88 ± 5.48 | 175.25 ± 11.86 |
|  | 1.00 | 188.74 ± 29.89 | 1346.21 ± 221.29 | 140.43 ± 7.71 | 922.91 ± 89.41 |
| 10.2 | 0.00 | 413.45 ± 66.44 | 1670.11 ± 229.21 | 413.45 ± 66.44 | 1670.11 ± 229.21 |
|  | 0.05 | 372.45 ± 46.06 | 1690.92 ± 294.71 | 226.63 ± 17.39 | 1318.10 ± 125.18 |
|  | 0.10 | 199.16 ± 23.37 | 1430.52 ± 159.61 | 631.45 ± 49.47 | 1690.85 ± 210.69 |
|  | 0.50 | 363.26 ± 54.04 | 1602.56 ± 185.23 | 478.18 ± 35.37 | 1845.22 ± 175.04 |
|  | 1.00 | 598.69 ± 82.99 | 1984.90 ± 345.76 | 454.90 ± 55.29 | 3568.23 ± 552.86 |
| 12.2 | 0.00 | 84.31 ± 1.58 | 89.09 ± 1.56 | 84.31 ± 1.58 | 89.09 ± 1.56 |
|  | 0.05 | 83.63 ± 2.21 | 94.35 ± 3.42 | 80.96 ± 1.99 | 99.74 ± 2.37 |
|  | 0.10 | 85.28 ± 4.21 | 97.71 ± 2.15 | 144.58 ± 8.48 | 182.14 ± 5.52 |
|  | 0.50 | 85.42 ± 3.99 | 102.39 ± 4.81 | 452.64 ± 68.54 | 1700.32 ± 287.78 |
|  | 1.00 | 98.80 ± 2.35 | 103.65 ± 3.16 | 99.23 ± 5.87 | 101.85 ± 2.72 |


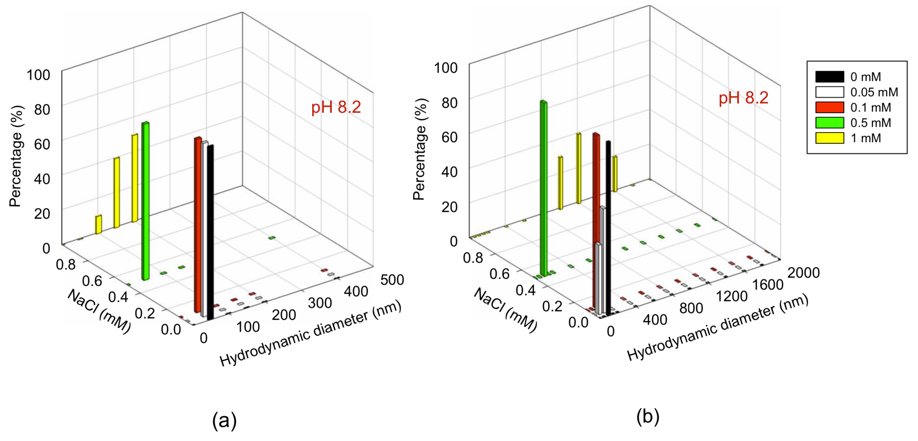

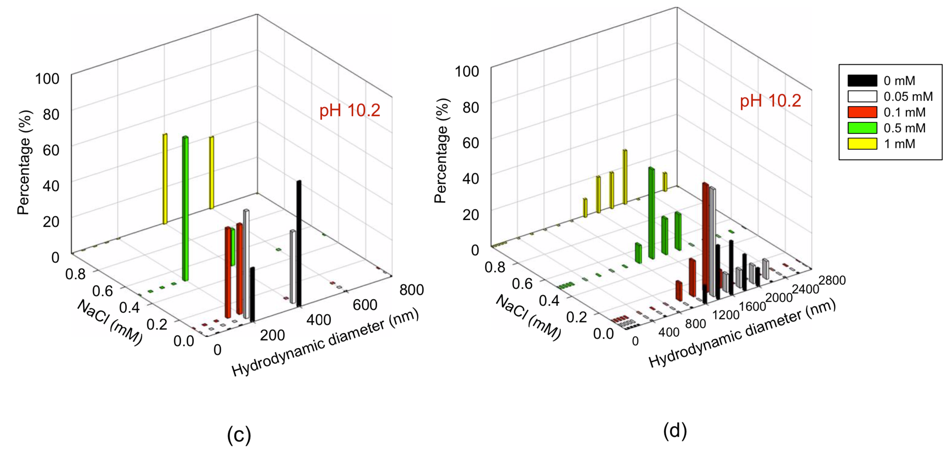


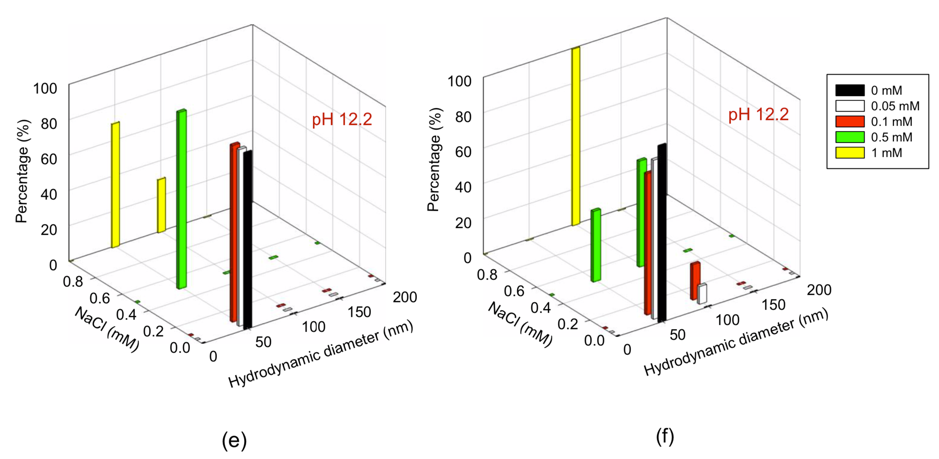


**Figure S2.** Particle size distribution of CeO2 NPs in the presence of NaCl. The time of the nanoparticle size measured by DLS is respectively (a) during the first 100 seconds and at pH 8.2, (b) at ~ 1 hr and at pH 8.2, (c) during the first 100 seconds and at pH 10.2, (d) at ~ 1 hr and at pH 10.2, (e) during the first 100 seconds and at pH 12.2, and (f) at ~ 1 hr and at pH 12.2. The legend shows the percentages of particle size distributed at each NaCl concentration.


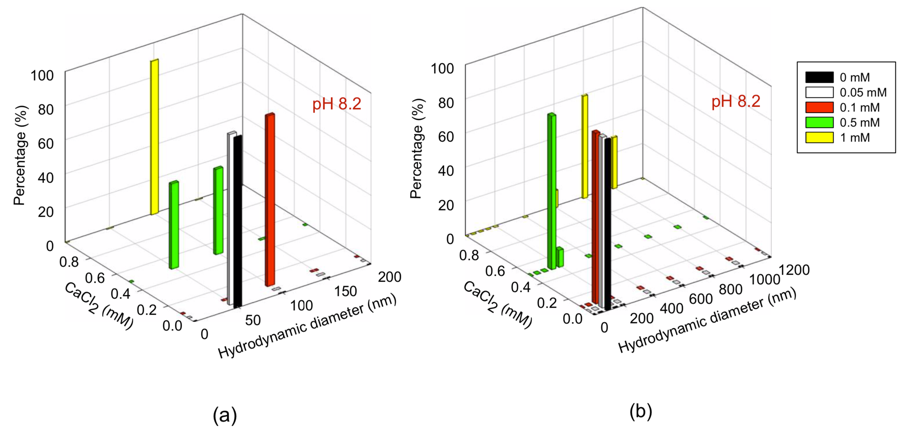

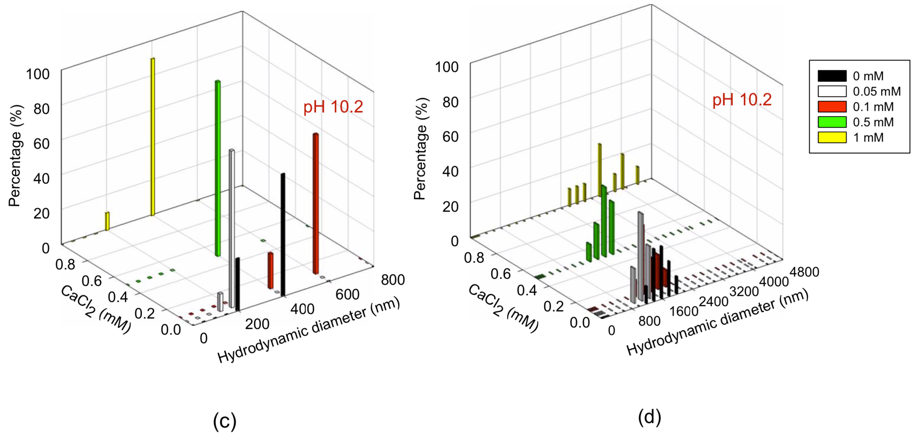


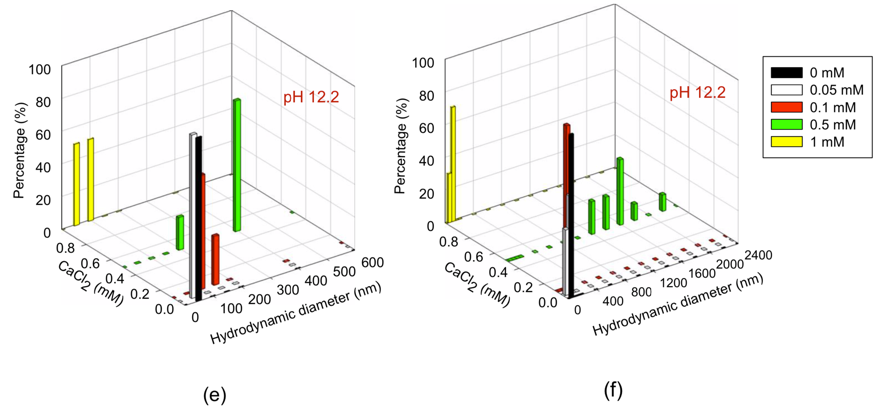


**Figure S3.** Particle size distribution of CeO2 NPs in the presence of CaCl2. The time of the nanoparticle size measured by DLS is respectively (a) during the first 100 seconds and at pH 8.2, (b) at ~ 1 hr and at pH 8.2, (c) during the first 100 seconds and at pH 10.2, (d) at ~ 1 hr and at pH 10.2, (e) during the first 100 seconds and at pH 12.2, and (f) at ~ 1 hr and at pH 12.2. The legend shows the percentages of particle size distributed at each CaCl2 concentration.

**Table S4.** The mean and standard deviation of hydrodynamic diameter of CeO2 NPs during the first 100 seconds and at ~ 1 hr of around 1-hour measurements at three different pHs (8.2, 10.2, and 12.2) and each NaCl/CaCl2 concentration in the presence of HA.

| pH | Electrolyte (mM) | HA | | | | |
| --- | --- | --- | --- | --- | --- | --- |
| NaCl | | CaCl2 | |
| Average Hydrodynamic diameter (nm) | | Average Hydrodynamic diameter (nm) | |
| During the first 100 seconds | At ∼1 hr | During the first 100 seconds | At ∼1 hr |
| 8.2 | 0.00 | 291.59 ± 77.83 | 1679.29 ± 183.07 | 291.59 ± 77.83 | 1679.29 ± 183.07 |
|  | 0.10 | 133.23 ± 3.95 | 183.78 ± 7.76 | 105.65 ± 5.22 | 186.48 ± 8.47 |
|  | 1.00 | 149.32 ± 21.41 | 1343.50 ± 119.71 | 173.66 ± 11.26 | 1397.18 ± 209.50 |
| 10.2 | 0.00 | 362.45 ± 56.46 | 1813.65 ± 287.38 | 362.45 ± 56.46 | 1813.65 ± 287.38 |
|  | 0.10 | 553.49 ± 52.98 | 1828.96 ± 318.22 | 470.83 ± 39.34 | 1584.86 ± 223.48 |
|  | 1.00 | 299.29 ± 54.61 | 1597.66 ± 257.13 | 458.75 ± 63.90 | 1746.21 ± 235.86 |
| 12.2 | 0.00 | 87.98 ± 2.61 | 93.92 ± 1.92 | 87.98 ± 2.61 | 93.92 ± 1.92 |
|  | 0.10 | 91.03 ± 3.14 | 97.67 ± 2.15 | 89.57 ± 2.64 | 94.50 ± 3.03 |
|  | 1.00 | 77.74 ± 2.31 | 93.86 ± 1.91 | 104.57 ± 4.04 | 110.13 ± 4.31 |


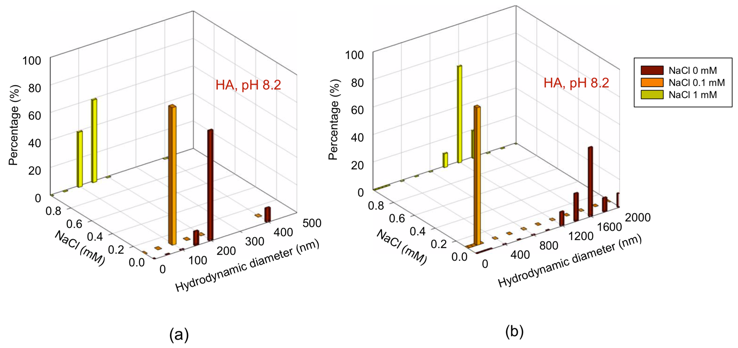

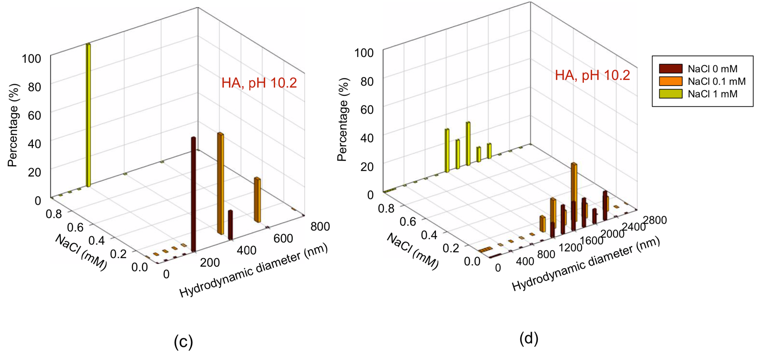

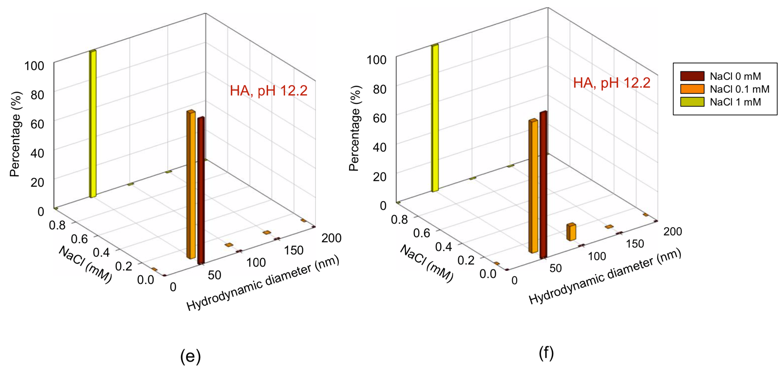


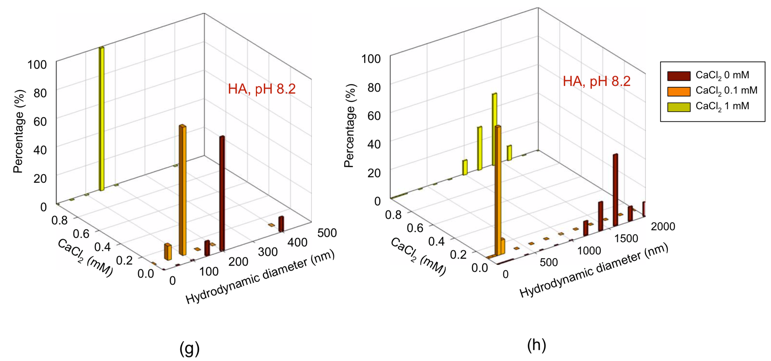

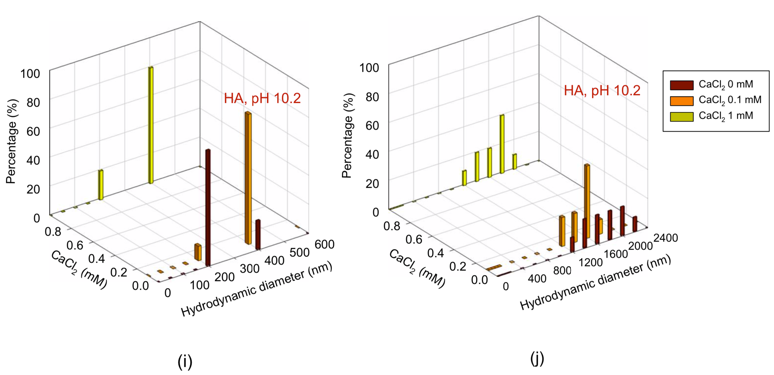

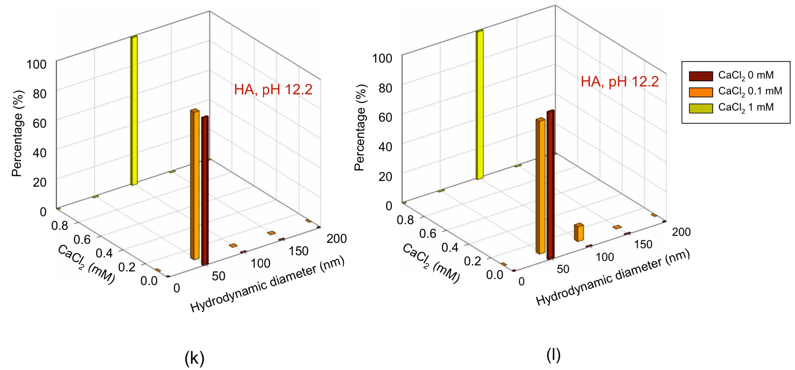


**Figure S4.** Particle size distribution of CeO2 NPs in the presence of HA. The time of the nanoparticle size measured by DLS is respectively (a) during the first 100 seconds in the presence of NaCl at pH 8.2, (b) at ~ 1 hr in the presence of NaCl at pH 8.2, (c) during the first 100 seconds in the presence of NaCl at pH 10.2, (d) at ~ 1 hr in the presence of NaCl at pH 10.2, (e) during the first 100 seconds in the presence of NaCl at pH 12.2, (f) at ~ 1 hr in the presence of NaCl at pH 12.2, (g) during the first 100 seconds in the presence of CaCl2 at pH 8.2, (h) at ~ 1 hr in the presence of CaCl2 at pH 8.2, (i) during the first 100 seconds in the presence of CaCl2 at pH 10.2, (j) at ~ 1 hr in the presence of CaCl2 at pH 10.2, (k) during the first 100 seconds in the presence of CaCl2 at pH 12.2, and (l) at ~ 1 hr in the presence of CaCl2 at pH 12.2. The legend shows the percentages of particle size distributed at each NaCl/CaCl2 concentration.

**Table S5.** The mean and standard deviation of hydrodynamic diameter of CeO2 NPs during the first 100 seconds and at ~ 1 hr of around 1-hour measurements at three different pHs (8.2, 10.2, and 12.2) and each NaCl/CaCl2 concentration in the presence of FA.

| pH | Electrolyte (mM) | FA | | | |
| --- | --- | --- | --- | --- | --- |
| NaCl | | CaCl2 | |
| Average Hydrodynamic diameter (nm) | | Average Hydrodynamic diameter (nm) | |
| During the first 100 seconds | At ∼1 hr | During the first 100 seconds | At ∼1 hr |
| 8.2 | 0.00 | 78.30 ± 4.54 | 100.84 ± 3.34 | 78.30 ± 4.54 | 100.84 ± 3.34 |
|  | 0.10 | 93.36 ± 1.95 | 101.87 ± 3.36 | 77.57 ± 4.70 | 92.56 ± 2.20 |
|  | 1.00 | 86.05 ± 4.20 | 108.14 ± 4.02 | 72.97 ± 3.53 | 93.60 ± 1.64 |
| 10.2 | 0.00 | 80.70 ± 4.75 | 100.47 ± 1.60 | 80.70 ± 4.75 | 100.47 ± 1.60 |
|  | 0.10 | 94.54 ± 5.34 | 104.37 ± 2.01 | 82.38 ± 3.49 | 99.49 ± 2.19 |
|  | 1.00 | 83.33 ± 3.10 | 99.75 ± 2.87 | 77.44 ± 4.25 | 97.02 ± 2.96 |
| 12.2 | 0.00 | 72.72 ± 4.16 | 113.06 ± 5.19 | 72.72 ± 4.16 | 113.06 ± 5.19 |
|  | 0.10 | 92.83 ± 2.54 | 97.39 ± 2.84 | 84.71 ± 1.85 | 94.68 ± 1.72 |
|  | 1.00 | 82.50 ± 1.77 | 94.35 ± 3.49 | 75.08 ± 6.54 | 100.82 ± 6.66 |


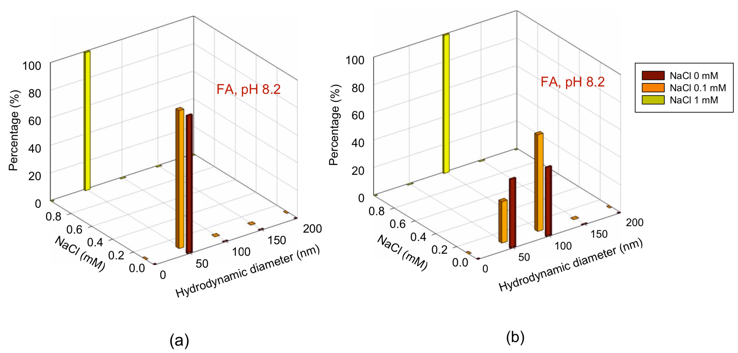

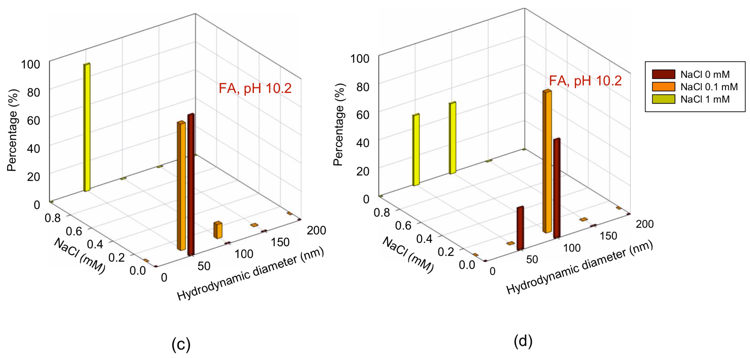

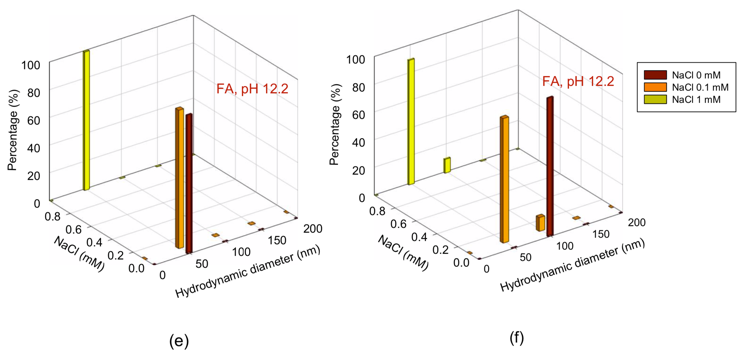


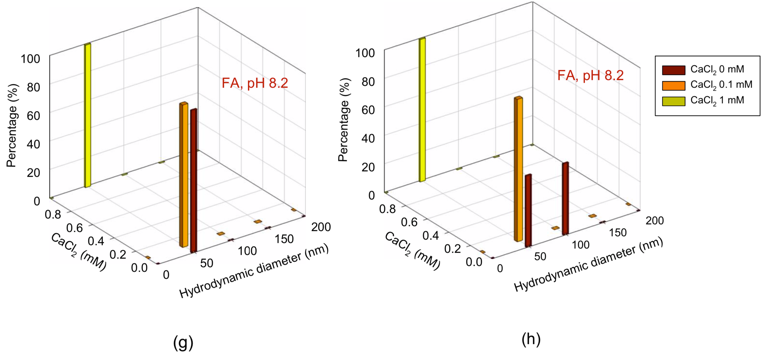

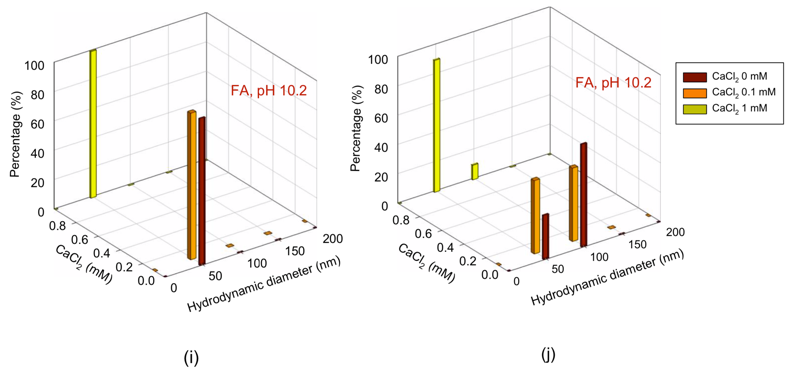

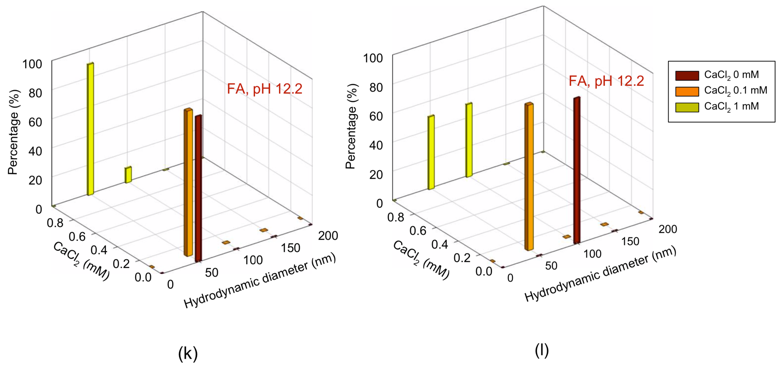


**Figure S5.** Particle size distribution of CeO2 NPs in the presence of FA. The time of the nanoparticle size measured by DLS is respectively (a) during the first 100 seconds in the presence of NaCl at pH 8.2, (b) at ~ 1 hr in the presence of NaCl at pH 8.2, (c) during the first 100 seconds in the presence of NaCl at pH 10.2, (d) at ~ 1 hr in the presence of NaCl at pH 10.2, (e) during the first 100 seconds in the presence of NaCl at pH 12.2, (f) at ~ 1 hr in the presence of NaCl at pH 12.2, (g) during the first 100 seconds in the presence of CaCl2 at pH 8.2, (h) at ~ 1 hr in the presence of CaCl2 at pH 8.2, (i) during the first 100 seconds in the presence of CaCl2 at pH 10.2, (j) at ~ 1 hr in the presence of CaCl2 at pH 10.2, (k) during the first 100 seconds in the presence of CaCl2 at pH 12.2, and (l) at ~ 1 hr in the presence of CaCl2 at pH 12.2. The legend shows the percentages of particle size distributed at each NaCl/CaCl2 concentration.
